# Supplementary material
Source: PubMed Central journal article supplement (PMC2373370)
Supplement: embor200845-s1.pdf [file embor200845-s1.pdf]

## **Supplemental Material and Methods**

### **Antibody generation**

Anti-COPR5 polyclonal antibody (EF1) was generated (Eurogentec) in Rabbits against a peptide corresponding to the last 18 amino-acids of human COPR5 (-PYYSKMFETGQFDDAED) (Fig. S3). Specific IgGs were further purified on NHS-bound peptide columns and concentrated at 0.2 µg/µl. This antibody was used at dilutions of 1:250 for western blots and 1:50 for immunofluorescence staining of fixed cells.

**Glycerol gradient analysis.** This analysis was performed as described in Le Cam et al., 1999.

### **Overlay/Far Western**

Overlay was performed essentially as previously described (Mateescu et al., 2004). Briefly, H4 and H3 N-terminal synthetic peptides were spotted onto nitrocellulose membrane and incubated with either purified GST-COPR5 or GST proteins. After washings, retained GST-COPR5 was detected by immunoblotting with an anti-GST Ab. .

### **PRMT's Methylation assay**

Methylation assay was performed for 1h at 30°C in 20 µl using either GST-COPR5 beads that have been incubated with U2Os nuclear extracts, or Flag immunoprecipitates (performed on nuclear extracts prepared from Flag-PRMT5 transfected cells), in the presence of different substrates (20µg of histones, 1µg of H4r or H3r, 5 µg MBP), 1µCi of S[methyl-3H]-Adenosyl-L-methionine (SAM) (10Ci/mmol, Perkin Elmer # Net 155250UC) and 10 µl of 2xMAB (100 mM Tris 8.5, 40 mM KCl, 20mM MgCl<sub>2</sub>, 500mM sucrose and 20mM β-SH added extemporaneously). Histone methylation was analyzed by fluorography after separation of substrats on a 15 % SDS-PAGE, stained by coomassie blue. Signal was amplified for 30 min in enhancer (Amersham), dried and exposed between 1 and 3 days at – 80°C.

### **Nucleosome reconstitution**

Mono-Nucleosome particles were reconstituted *in vitro* around a DNA fragment of the *CCNE1* promoter encompassing the nu12 DNA region. DNA fragment was amplified by PCR from *CCNE1*-Luc reporter construct using the GC genomic amplification PCR kit (BD) and the following primers : nuCE f biot-GTAAAAGAACACGCCCCCG and nuCEr TGTCGAGCCGGCTGCTCCTG. DNA fragment was purified on agarose gel and then bound to streptavidin beads M280 (Dyna). Oligo-bound beads were first incubated 15 min à 37°C in 10µl of 2M NaCl, 0,1mg/mL BSA and 5µg of histones prepared from HeLa cell nuclei using a DNA/histone molar ratio of 1/1. Nucleosomes were then formed by salt jump dilution method

according to Owen-Hughes et al., 1999. Histones were prepared from HeLa nuclei recovered in 100µl of 7M guanidinium, 20mM tris 7.5, 10mM DTT, and then dialyzed overnight at 4° C in storage buffer (10mM tris 7.5, EDTA 1 mM, βmercaptoethanol 5 mM, 2M NaCl).

### **Supplemental references**

El Messaoudi, S., Fabrizio, E., Rodriguez, C., Chuchana, P., Fauquier, L., Cheng, D., Theillet, C., Vandell, L., Bedford, M. and Sardet, C. (2006) PRMT4 / CARM1 is a cyclin E1 gene regulator. *Proc Natl Acad Sci USA*, **36** : 13351-13356

Herbst, A. and Tansey, W.P. (2000) HAM: a new epitope-tag for in vivo protein labeling. *Mol Biol Rep*, **27** : 203-208

Le Cam, L., Polanowska,, J. Geng ,Y., Fabrizio, E., Olivier, M., Philips, A., Ng Eaton, E. Classon, M. and Sardet, C. (1999 ) timing of cyclin E gene expression depends on the regulated association of a bipartite repressor element with a novel E2F complex. *EMBO. J.* **18**: 1878-1885,

Mateescu, B., England, P., Halgand, F., Yaniv, M. and Muchardt, C. (2004) Tethering of HP1 proteins to chromatin is relieved by phosphoacetylation of histone H3. *EMBO Rep*, **5** : 490-496

Owen-Hughes, T., Utleay, R.T., Steger, D.J., West, J.M., John, S., Cote, J., Havas, K.M. and Workman, J.L. (1999) Analysis of nucleosome disruption by ATP-driven chromatin remodeling complexes. *Methods Mol Biol*, 119 : 319-331

## Supplemental Figures :

### S1A

ClustalW format <http://www.bioinformatics.nl/tools/muscle.html>  
MUR MUSCLE (3.51) multiple sequence alignment

```
Homo      MDLQAAGAQAQAAEF SRGPPLPSARGAPPSPEAGFATADHSGQERETEKAMDRLARGTQ
Macaca    MDPQAARAQARRAAEF SRGPPLPSAQEAPPSPEAGFATADHSSQERETEKAMDRLARGAQ
Bos       MDPPTAGAQLGAAEQPRGLQLPSGREAPPSPGTAFAPADHSSQEKATENATDRLANGAQ
Mus       MDPQAA-----TGRGPGERS SQA-PSAAGFATADLSGRETELEAVDRLASGAQ
Rattus    MDPQAA-----TGPGPGEPSAWEA-PSAAGLATADLSGGETETELVDRLASGAQ
**  :*          *   *.. * ** . :!* ** * * ** ***** ;!*

Homo      SIPNDS PARGEGTHSEEEGFAMDEEDSDGELNTWELSEG-TNCPFKEQPGDLFNEDWDS
Macaca    SVPNDS PAQQEGTHSEEEGFAMDEEDSDGELNTWELSEG-TNCPFKEQPGDIFNEDWDL
Bos       SIPHDS PAHGEGTHCEEEGFAMDEEDSDGEPSPWELSEGMSGCLPKQAGDLFHEDWDL
Mus       SIPADI PAHAEGPSSEEEGFAVEKE-ADGELYAWELSEG-PSCPPMEQAADLFNEDWDL
Rattus    SIPTDV PTHAEGPSSEEEGFAMEKE-ADGELYAWELSEG-PACPPMEQAGLFNEDWDL
*:* * !:..** . ***** !:* :*** .***** . * * **..!:* *****

Homo      LKADQGNPYDADDIQESISQELKPVVCCAPQGDMIYDPSWHPPLIPYYSKMVFETGQF
Macaca    LKADQGNPYDADDIQESISQELKPVVCCAPQGDMIYDPSWHPPLIPHYSKMVFETGQF
Bos       LKADQGNPYDADDIQCLSQEVVPCAPQGDMIYDPSWHPPLIPHYSKMVFETGQF
Mus       LKADQGNPYDADDIQGSIQELKPVVCCAPQGDMIYDPSWHPPLIPHYSKMVFETGQF
Rattus    LKADQGNPYDADDVQGSISQELKPVVCCAPQGDMMYDPSWHPPLIPHYSKMVFETGQF
*****;* . :***;*****;*****;*****;*****

Homo      DDAED
Macaca    DDAED
Bos       DDAED
Mus       DDAED
Rattus    DDAED
*****
```

### S1B

MUSCLE (3.51) multiple sequence alignment

```
Homo      MDLQAAGAQAQAAEF SRGPPLPSARGAPPSPEAGFATADHSGQERETEKAMDRLARGTQ
Gallus    ---MAATLEHTSFEEEQPFNKKEIMTWKPTB---VKPKILGQTKADECLLNILCVLD
*.: ! : * .. * .: *! ..... ** . * !:..:

Homo      SIPNDS PARGEGTHSEEEGFAMDEEDSD--GELNTWELSEGTCNCPFKEQPGDLFNEDWDS
Gallus    SDESEGFSDISACEDDVSHTDTDMEDLCGELS--RMPEDVTFPQQQTASTYEVEDWDK
* .!* . .: !: !: * ! . * ** . !:..* * :! .. *****

Homo      ELKADQGNPYDADDIQESISQELKPVVCCAPQGDMIYDPSWHPPLIPYYSKMVFETGQ
Gallus    ELKESECSFYDAGDLYCGSFQENLLASYSFREDSLYNPCCHHAACLAFTLFPVRNTEVQ
** : . *****; . * * ! .. ! . * !:!* **.. * . : **

Homo      FDDAED
Gallus    FDDADE
*****
```

Figure S1: (A) alignment of mammalian COPR5 protein sequences.  
(B) alignment of human and chicken COPR5 protein sequences

## S1C

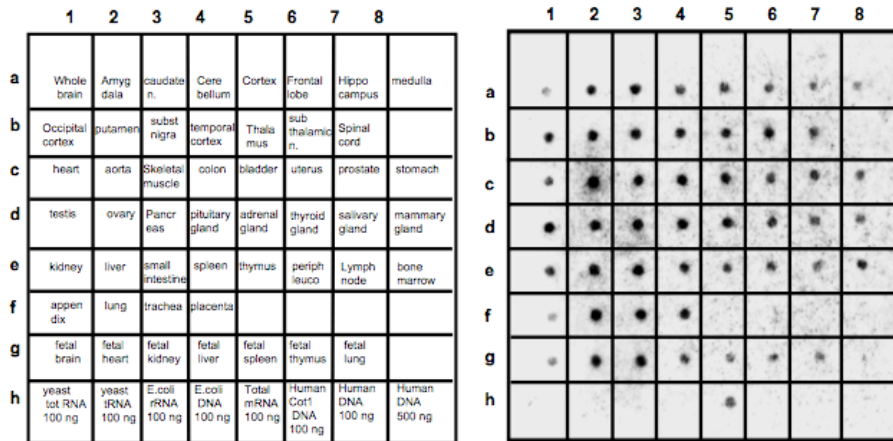

**Figure S1C : COPR5, an ubiquitously expressed gene.** Northern blot analysis of human *COPR5* mRNA expression. RNA Master Blot (Clontech) of different tissue RNAs, spotted as indicated in the left panel, was probed with a [<sup>32</sup>P]labelled *COPR5* cDNA (right panel). Lanes a-f correspond to adult tissues. Lane g corresponds to fetal tissues. Lane h corresponds to various controls.

**S2**

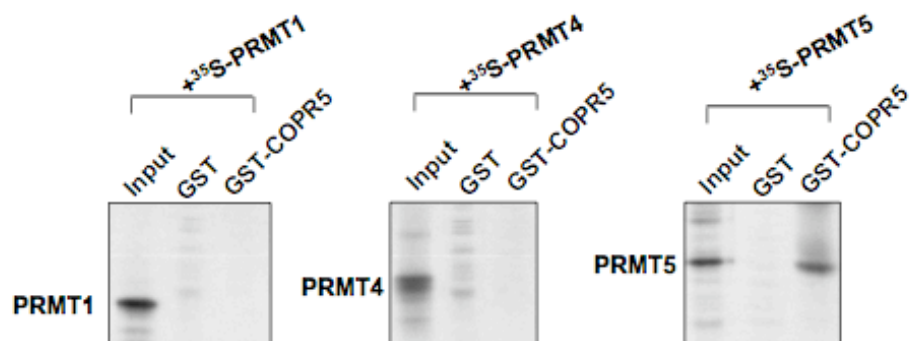

**Figure S2: COPR5 is a PRMT5 binding protein.** Similar amounts of GST and GST-COPR5 were bound to glutathione beads and then incubated in the presence of *in vitro* translated and [ $^{35}\text{S}$ ]-radiolabeled PRMT1, PRMT4 and PRMT5 proteins. The proteins bound by these beads, and a fraction of the PRMTs used as input were analyzed by fluorography.

### S3

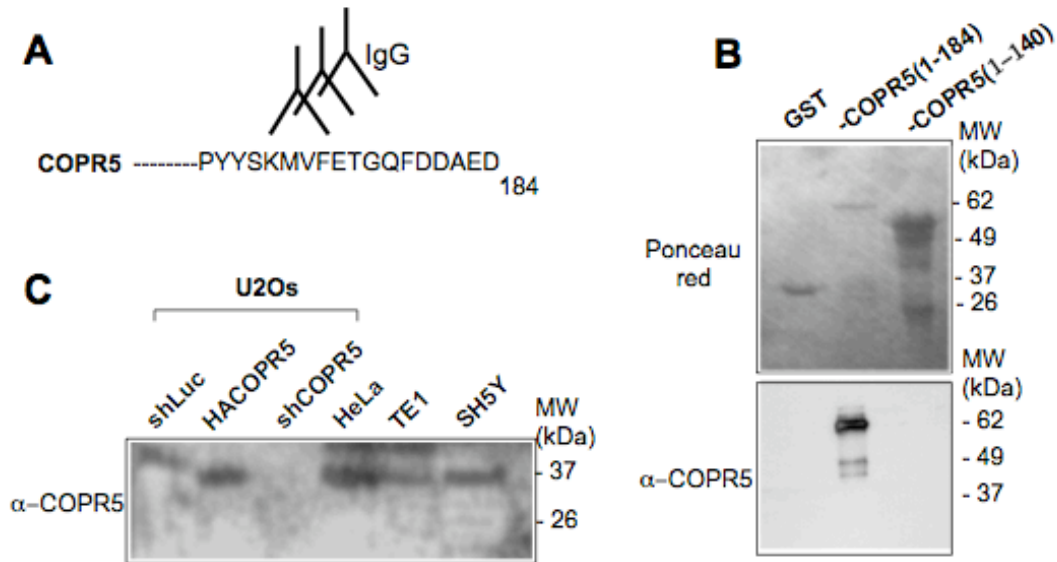

**Figure S3: (A)** Development of an a rabbit polyclonal antibody directed against the last 18 C-terminal of the Human COPR5 protein.

**(B)** Recombinant GST proteins (GST alone or GST fused to full length COPR5 (-COPR5(1-184)) or to a truncated version of COPR5 (-COPR5(1-140) deleted from the C-ter epitope recognized by the antibody) were probed by immunoblotting with the  $\alpha$ -COPR5. **(C)** Immunoblotting analysis of various cellular extracts probed with  $\alpha$ -COPR5. Cellular extracts were prepared from *i/* U20s (osteosarcoma cell line) transduced with retroviral vectors coding for either control shRNA (shLuc), shRNA directed against COPR5 (shCOPR5), or for Ha-tagged COPR5; *ii/* other cancer cell lines, HeLa (Cervix carcinoma), SH5Y (Neuroblastoma) and TE1 (oesophageal carcinoma).

**S4**

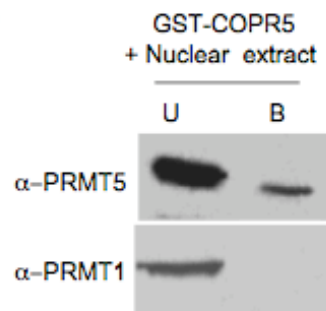

**Figure S4 : PRMT5, but not the other H4R3 methyl-transferase PRMT1, is present on GST-COPR5 beads used in the methylation assay shown figure 2A.** U2Os nuclear extracts were added to GST-COPR5 beads as in Fig.2A and after extensive washing, the bound (B) and unbound (U) fractions were probed for the presence of PRM5 and PRMT1 by immunoblotting using polyclonal  $\alpha$ -PRMT5 and  $\alpha$ -PRMT1 antibodies, respectively.

## S5

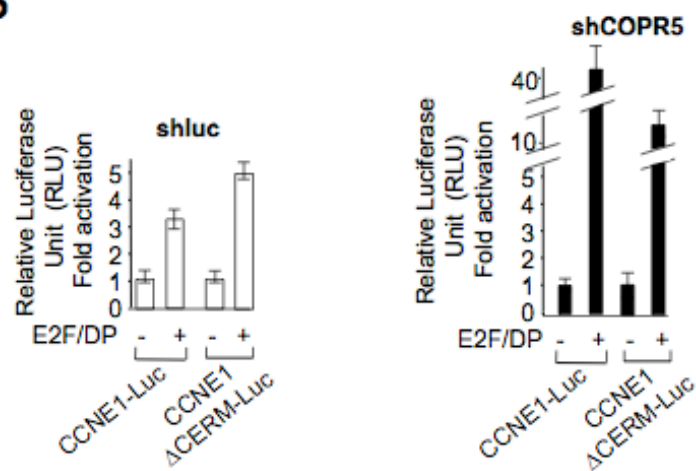

**Figure S5 : shCOPR5-mediated depletion of COPR5 in U2Os cells potentiates the transactivation of the *CCNE1* promoter by E2F/DP.** Cells infected either with shCOPR5 or shluc retroviral particles were transfected with the CCNE1ELuc or CCNE1ΔCERMLuc reporter constructs together with plasmids encoding E2F, DP and CMV-βgal. Results normalized to β-galactosidase activity are expressed as fold activation and are representative of two independent experiments performed in duplicates.
